# Supplementary material for: PLGA scaffold carrying icariin to inhibit the progression of osteoarthritis in rabbits
Source: PubMed Central journal article supplement (PMC6502375; doi:10.1098/rsos.181877), 2019-04-10
Supplement: rsos181877supp1.pdf [file rsos181877supp1.pdf]

## 伦理审查批件

审查号: CCZYFYLL2017 审字-057

|         |                                                                                                                                                                                                                                                                                                                                                                                                                                                                                                                                                                                                |      |                    |
|---------|------------------------------------------------------------------------------------------------------------------------------------------------------------------------------------------------------------------------------------------------------------------------------------------------------------------------------------------------------------------------------------------------------------------------------------------------------------------------------------------------------------------------------------------------------------------------------------------------|------|--------------------|
| 审查日期    | 2017年11月15日                                                                                                                                                                                                                                                                                                                                                                                                                                                                                                                                                                                    |      |                    |
| 审查地点    | 长春市工农大路1478号                                                                                                                                                                                                                                                                                                                                                                                                                                                                                                                                                                                   |      |                    |
| 临床研究批文  | 不适用                                                                                                                                                                                                                                                                                                                                                                                                                                                                                                                                                                                            |      |                    |
| 临床研究项目  | 淫羊藿对骨性关节炎软骨细胞分化及凋亡的作用研究                                                                                                                                                                                                                                                                                                                                                                                                                                                                                                                                                                        |      |                    |
| 审查文件    | <input checked="" type="checkbox"/> 初始审查申请表 <input checked="" type="checkbox"/> 临床研究方案(版本号: 1.0) <input checked="" type="checkbox"/> 知情同意书(版本号: 1.0)<br><input checked="" type="checkbox"/> 项目任务书 <input checked="" type="checkbox"/> 主要研究者履历                                                                                                                                                                                                                                                                                                                                                  |      |                    |
| 申办者/CRO | 长春中医药大学附属医院                                                                                                                                                                                                                                                                                                                                                                                                                                                                                                                                                                                    |      |                    |
| 临床研究单位  | 长春中医药大学附属医院骨科中心                                                                                                                                                                                                                                                                                                                                                                                                                                                                                                                                                                                |      |                    |
| 主要研究者   | 李绍军                                                                                                                                                                                                                                                                                                                                                                                                                                                                                                                                                                                            |      |                    |
| 伦理审查方式  | <input checked="" type="checkbox"/> 会议审查 <input type="checkbox"/> 快速审查                                                                                                                                                                                                                                                                                                                                                                                                                                                                                                                         |      |                    |
| 审查人员    | 郝东明, 王秀阁, 邓悦, 李新建, 冷炎, 姜丽红, 夏淑范, 韩祎, 刘怀, 李琳, 杨铁峥, 连树林                                                                                                                                                                                                                                                                                                                                                                                                                                                                                                                                          |      |                    |
| 审查意见    | <p>根据中华人民共和国国家食品药品监督管理局2003年颁布实施的《药物临床试验质量管理规范》以及《赫尔辛基宣言》和国际医学科学组织委员会颁布的《人体生物医学研究国际道德指南》的伦理原则, 经本伦理委员会审查, 同意在长春中医药大学附属医院进行“淫羊藿对骨性关节炎软骨细胞分化及凋亡的作用研究(方案版本号: 1.0)”临床试验。</p> <p>本批件将在本中心机构及其伦理委员会备案。如果对方案在本机构的可行性(包括研究者的资格与经验、设备与条件等)有不同意见, 请及时与本伦理委员会联系。</p> <p>本审查自签发日期有效期2年, 研究负责人必须严格使用经审查同意的知情同意书文本和研究方案。如伦理审查批件失效时不能完成所有的临床研究(包括统计分析), 请在本批件失效前一个月, 递交跟踪审查申请。请于2018年11月16日前1个月提交跟踪审查; 如研究结束并在审查有效期内, 请向本伦理委员会提交研究结题报告; 暂停/提前终止临床研究, 请及时通知伦理委员会; 如发生严重不良事件以及影响研究风险受益比的非预期不良事件, 应及时报告本伦理委员会; 临床研究方案、知情同意书的任何修改, 包括主要研究者的更换等, 需递交研究方案修改申请表, 经伦理委员会重新审查, 获得批准后执行; 发现影响受试者参加研究意愿的违反方案情况应及时报告。</p> |      |                    |
| 批件有效期   | 2017年11月16日~2019年11月16日                                                                                                                                                                                                                                                                                                                                                                                                                                                                                                                                                                        | 联系电话 | 高宏伟: 0431-86177876 |
| 主任委员签字: | <div style="display: flex; justify-content: space-between; align-items: center;"> <div style="text-align: center;"> 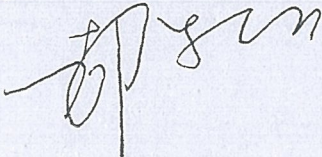 </div> <div style="text-align: center;">  <p>伦理委员会盖章<br/>日期: 2017年11月16日</p> </div> </div>                                                                                                                                                                                                        |      |                    |
